# Supplementary material for: Improving the protein activity and stability under acidic conditions via site-specific conjugation of a pH-responsive polyelectrolyte
Source: Royal Society of Chemistry journal article supplement (doi:10.1039/c4tb01741b), 2014-11-19
Supplement: c4tb01741b1.pdf [file c4tb01741b1.pdf]

1                                    **Electronic Supplementary Information**  
2  
3                                    **for**  
4                                    **Improving protein activity and stability in acidic conditions via site-**  
5                                    **specific conjugation of a pH-responsive polyelectrolyte**

6   **Lei Wang,<sup>a</sup> Xin Li,<sup>a</sup> Lin Yuan,<sup>\*a</sup> Hongwei Wang,<sup>a</sup> Hong Chen<sup>\*a</sup> and John L. Brash<sup>b</sup>**

7   <sup>a</sup> The Key Lab of Health Chemistry and Molecular Diagnosis of Suzhou, Department of  
8   Polymer Science and Engineering, College of Chemistry, Chemical Engineering and  
9   Materials Science, Soochow University, 199 Ren'ai Road, Suzhou, 215123, P. R. China.

10   <sup>b</sup> School of Biomedical Engineering, Department of Chemical Engineering, McMaster  
11   University, Hamilton, Ontario, Canada.

12                                    E-mail: yuanl@suda.edu.cn (L. Yuan); chenh@suda.edu.cn (H. Chen)

13                                    **Table of Contents**

14   **Table S1.** Specific activities of native PPase and mutants for the hydrolysis of sodium  
15   pyrophosphate at pH 8.0.

16   **Figure S1.** <sup>1</sup>H NMR of pDMAEMA and the corresponding pyridyl disulfide-functionalized  
17   pDMAEMA.

18   **Table S2.** <sup>1</sup>H NMR results of pDMAEMA with increasing polymerization time.

19   **Figure S2.** GPC traces of pDMAEMA with increasing molecular weight before and after  
20   pyridyl disulfide functionalization.

21   **Figure S3.** Relative activity of PPase-pDMAEMA conjugates compared to that of  
22   unconjugated PPase at different pH.

23   **Figure S4.** Zeta potential of pDMAEMA with increasing molecular weight and PPase and  
24   PPase-pDMAEMA conjugates determined by DLS at different pH.

25   **Table S3.** Hydrodynamic diameter of PPase and PPase-pDMAEMA conjugates at different  
26   pH.

26 **Table S1.** Specific activities of native PPase and mutants for the hydrolysis of sodium  
 27 pyrophosphate at pH 8.0. Mean +/- SD, n=3.

| PPase samples | Specific activity (kat/kg) |
|---------------|----------------------------|
| Native PPase  | $8.57 \pm 0.19$            |
| K148C mutant  | $8.77 \pm 0.10$            |
| N124C mutant  | $7.20 \pm 0.09$            |

28

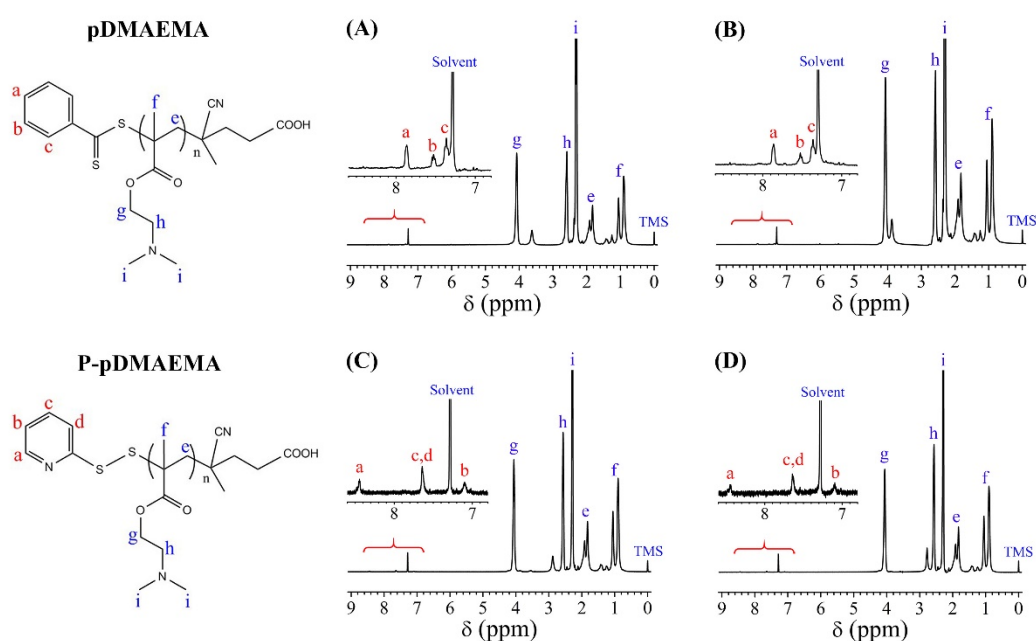

29

30 **Figure S1.** <sup>1</sup>H NMR of pDMAEMA (A and B) and the corresponding pyridyl disulfide-  
 31 functionalized pDMAEMA (C and D). Solvent: CDCl<sub>3</sub>. A and C: P<sub>2</sub> (Polymerization time: 4  
 32 h); B and D: P<sub>3</sub> (Polymerization time: 12 h)

33 **Table S2.** <sup>1</sup>H NMR results of pDMAEMA with increasing polymerization time.

| pDMAEMA        | Polymerization time | Monomer conversion | Theoretical M <sub>n</sub> | Polymerization degree | M <sub>n</sub> by HNMR |
|----------------|---------------------|--------------------|----------------------------|-----------------------|------------------------|
| P <sub>1</sub> | 2 h                 | 34.7%              | 11 200                     | 72                    | 11 600                 |
| P <sub>2</sub> | 4 h                 | 65.6%              | 20 900                     | 162                   | 25 700                 |
| P <sub>3</sub> | 12 h                | 92.9%              | 29 500                     | 190                   | 30 100                 |

34

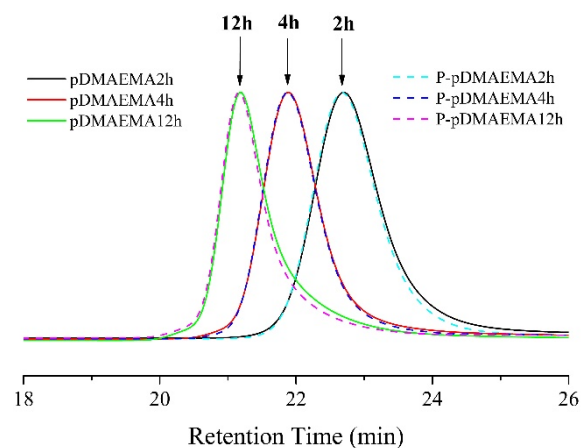

35

36 **Figure S2.** GPC traces of pDMAEMA with increasing molecular weight before (solid lines)  
 37 and after (dashed lines) pyridyl disulfide functionalization.

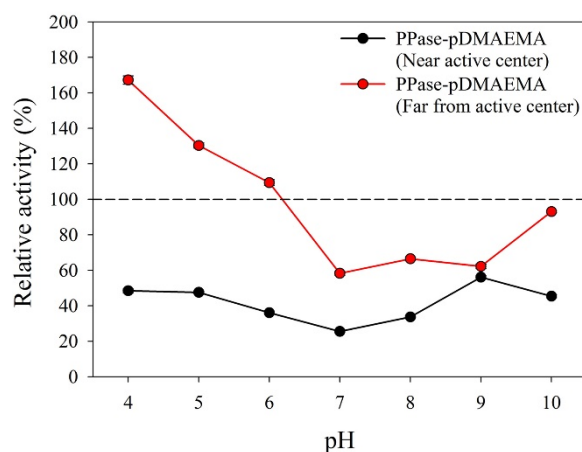

38

39 **Figure S3.** Relative activity of PPase-pDMAEMA conjugates compared to that of  
 40 unconjugated PPase at different pH. Black line: conjugates with polymer near the protein  
 41 active center. Red line: conjugates with polymer far from the protein active center. Mean +/-  
 42 SD, n=3.

43 **Table S3.** Hydrodynamic diameter of PPase and PPase-pDMAEMA conjugates at different  
 44 pH.

| Samples              | pH 4   | pH 5   | pH 6   | pH 7  | pH 8  | pH 9 | pH 10 |
|----------------------|--------|--------|--------|-------|-------|------|-------|
| PPase                | 3531.0 | 3420.3 | 2682.0 | 8.3   | 6.8   | 6.6  | 5.3   |
| PPase-P <sub>1</sub> | 6.7    | 6.9    | 7.0    | 162.7 | 361.8 | 15.0 | 6.1   |
| PPase-P <sub>2</sub> | 11.0   | 11.8   | 10.6   | 144.7 | 865.8 | 12.6 | 8.0   |
| PPase-P <sub>3</sub> | 14.9   | 10.8   | 10.8   | 9.9   | 939.9 | 7.5  | 13.1  |

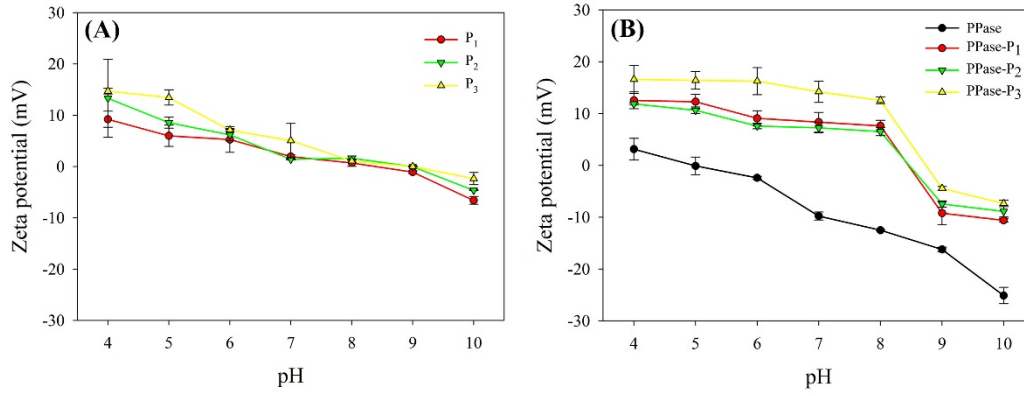

45

46 **Figure S4.** Zeta potential of pDMAEMA with increasing molecular weight (A) and PPase  
 47 and PPase-pDMAEMA conjugates (B) determined by DLS at different pH. Mean +/- SD, n=3.

48
